# Supplementary material for: Analgosedation of adult patients with elevated intracranial pressure
Source: Springer Nature journal article supplement (doi:10.1007/s00508-017-1228-5), 2017-07-21
Supplement: MOESM2 [file 14915102]

**Supplemental Table 5: Detailed list of substances and combinations as presented by respondents (short-term sedation < 72h)**

| **Short-term sedation, presented per center** | | | | | | | | | | |
| --- | --- | --- | --- | --- | --- | --- | --- | --- | --- | --- |
| Center | Midazolam | Esketamine | Propofol | Barbiturates | Remifentanil | Fentanyl | Sufentanil | Clonidine | Dexmedetomidine | others |
| 1 |  |  | Propofol |  | Remifentanil |  |  | Clonidine |  |  |
| 2 |  |  | Propofol |  | Remifentanil |  |  |  |  |  |
| 3 |  | Esketamine | Propofol |  |  |  |  |  |  | others |
| 4 |  |  | Propofol |  | Remifentanil |  |  |  |  |  |
| 5 |  |  | Propofol |  |  |  | Sufentanil |  |  | others |
| 6 | Midazolam | Esketamine | Propofol |  |  |  | Sufentanil |  |  |  |
| 7 | Midazolam | Esketamine |  |  |  |  | Sufentanil |  |  |  |
| 8 |  | Esketamine | Propofol |  |  | Fentanyl |  | Clonidine | Dexmedetomidine |  |
| 9 | Midazolam | Esketamine | Propofol |  |  |  | Sufentanil |  |  | others |
| 10 |  |  | Propofol |  | Remifentanil |  |  |  |  |  |
| 11 | Midazolam |  |  |  |  |  | Sufentanil |  |  |  |
| 12 |  |  | Propofol |  | Remifentanil |  |  |  |  |  |
| 13 | Midazolam |  |  |  |  |  | Sufentanil |  |  |  |
| 14 |  |  | Propofol |  | Remifentanil |  |  |  |  |  |
| 15 |  |  | Propofol |  | Remifentanil |  |  |  |  |  |
