# Supplementary material for: Analgosedation of adult patients with elevated intracranial pressure
Source: Springer Nature journal article supplement (doi:10.1007/s00508-017-1228-5), 2017-07-21
Supplement: MOESM3 [file 14915102]

**Supplemental Table 6: Detailed list of substances and combinations as presented by respondents (long-term sedation > 72h)**

| **Long-term sedation, presented per center** | | | | | | | | | | | |
| --- | --- | --- | --- | --- | --- | --- | --- | --- | --- | --- | --- |
| Center | Midazolam | Esketamine | Etomidate | Propofol | Barbiturates | Remifentanil | Fentanyl | Sufentanil | Clonidine | Dexmetedomidine | others |
| 1 | Midazolam | Esketamine |  |  |  | Remifentanil |  |  | Clonidine |  |  |
| 2 | Midazolam |  |  | Propofol |  |  |  | Sufentanil |  | Dexmetedomidine |  |
| 3 | Midazolam | Esketamine |  |  | Barbiturates |  |  | Sufentanil |  |  |  |
| 4 |  |  |  |  | Barbiturates | Remifentanil |  |  |  |  |  |
| 5 | Midazolam | Esketamine |  |  |  |  |  | Sufentanil |  |  |  |
| 6 | Midazolam | Esketamine |  |  |  |  |  | Sufentanil |  |  |  |
| 7 | Midazolam | Esketamine |  |  |  |  |  | Sufentanil |  |  |  |
| 8 | Midazolam | Esketamine |  |  |  |  | Fentanyl | Sufentanil | Clonidine | Dexmetedomidine |  |
| 9 | Midazolam | Esketamine |  |  |  |  |  | Sufentanil |  |  |  |
| 10 |  | Esketamine |  | Propofol |  | Remifentanil |  |  | Clonidine |  |  |
| 11 | Midazolam | Esketamine |  |  |  |  |  | Sufentanil |  |  |  |
| 12 | Midazolam |  |  |  |  |  |  | Sufentanil |  |  |  |
| 13 | Midazolam | Esketamine |  |  |  |  |  | Sufentanil |  |  |  |
| 14 | Midazolam | Esketamine |  | Propofol |  |  | Fentanyl |  | Clonidine |  |  |
| 15 | Midazolam |  |  | Propofol |  | Remifentanil |  | Sufentanil |  | Dexmetedomidine |  |
